# Supplementary material for: The causal effect of educational attainment on stress urinary incontinence: a two-sample mendelian randomization study
Source: BMC Womens Health. 2023 Nov 2;23:564. doi: 10.1186/s12905-023-02724-2 (PMC10621122; doi:10.1186/s12905-023-02724-2)
Supplement: Supplementary file 2 — Additional file 2: Supplementary Table 2. IVs of "Qualifications: College or University degree". [file 12905_2023_2724_MOESM2_ESM.xlsx]

## Sheet: Supplementary Table 2 
Supplementary Table 2: IVs of "Qualifications: College or University degree"
	samplesize	SNP	b	se	p
1	463010	rs1007274	0.00146306	0.0320569	0.963598
2	463010	rs10088132	-0.0269983	0.0238306	0.257246
3	463010	rs10129035	-0.0118725	0.0266616	0.656099
4	463010	rs10138733	-0.0413602	0.0267455	0.121999
5	463010	rs10189857	0.0162509	0.0209433	0.437781
6	463010	rs10431632	-0.0688057	0.0312126	0.0274948
7	463010	rs10515044	-0.0488351	0.0319073	0.125886
8	463010	rs10518019	0.00859846	0.0250751	0.731667
9	463010	rs1073242	-0.0265219	0.0175351	0.130405
10	463010	rs10752262	0.0480065	0.0307721	0.118745
11	463010	rs10795831	-0.0169921	0.0319651	0.595014
12	463010	rs10801826	-0.0278326	0.0195333	0.154193
13	463010	rs10942580	-0.047195	0.0286244	0.0991955
14	463010	rs10950862	0.0790678	0.0281645	0.00499495
15	463010	rs11080256	-0.0200531	0.0315381	0.524882
16	463010	rs11155821	-0.0229449	0.0256276	0.370616
17	463010	rs11171739	-0.0603027	0.0264534	0.0226325
18	463010	rs11209952	0.0102	0.0213237	0.632409
19	463010	rs11514731	-0.00444116	0.0241115	0.853862
20	463010	rs11678980	-0.0198615	0.0212123	0.34911
21	463010	rs11703948	0.0052056	0.0254126	0.837695
22	463010	rs11711894	0.0286947	0.0298525	0.336443
23	463010	rs11771370	0.0186237	0.0284242	0.512335
24	463010	rs11772108	-0.0220616	0.0263327	0.402141
25	463010	rs11773992	-0.0114924	0.0317854	0.717678
26	463010	rs117799466	-0.0177192	0.0281235	0.528662
27	463010	rs11793831	-0.0054549	0.0139246	0.695246
28	463010	rs11915747	-0.0257561	0.0204311	0.207441
29	463010	rs12028010	-0.0239744	0.0261733	0.359675
30	463010	rs12203182	-0.0181324	0.030278	0.549263
31	463010	rs12221820	0.0338738	0.0316228	0.284088
32	463010	rs12359372	-0.000235739	0.029812	0.993691
33	463010	rs12375949	-0.0199855	0.0243159	0.411129
34	463010	rs12523278	-0.0505307	0.0196904	0.0102803
35	463010	rs12526814	0.00979901	0.0297243	0.741655
36	463010	rs12619354	-0.00181558	0.0275209	0.947401
37	463010	rs12637456	-0.0555042	0.0311639	0.074906
38	463010	rs12735232	-0.0211992	0.0251401	0.399092
39	463010	rs1275202	-0.0187592	0.0288657	0.51577
40	463010	rs12779657	0.0493815	0.0312685	0.114273
41	463010	rs12991254	0.0083553	0.0188021	0.656767
42	463010	rs13033324	-0.0225821	0.0284385	0.427157
43	463010	rs1325604	-0.0206456	0.0282792	0.46535
44	463010	rs1333380	0.00472139	0.0318388	0.882114
45	463010	rs13397208	-0.00173144	0.0320372	0.9569
46	463010	rs13426183	-0.0319099	0.029003	0.271234
47	463010	rs1391441	-0.00561008	0.0219486	0.798259
48	463010	rs1455349	-0.0170894	0.0312103	0.583996
49	463010	rs1536057	-0.0883721	0.0308427	0.00416679
50	463010	rs1612548	0.000980494	0.0279399	0.972006
51	463010	rs16828793	0.012728	0.0309421	0.680815
52	463010	rs1727302	-0.0246785	0.025515	0.333437
53	463010	rs17328524	-0.0764006	0.0304936	0.0122292
54	463010	rs175325	-0.0386808	0.0281652	0.169643
55	463010	rs17563464	-0.0289089	0.0257452	0.261486
56	463010	rs1812587	0.0203695	0.0277262	0.462543
57	463010	rs1846228	0.00221319	0.0288803	0.938915
58	463010	rs1914391	-0.00196834	0.0265826	0.940974
59	463010	rs1919489	-0.0397276	0.0309224	0.198878
60	463010	rs1998086	-0.0360253	0.028477	0.205847
61	463010	rs2052284	-0.000263853	0.0306	0.99312
62	463010	rs2061245	-0.00147885	0.0305901	0.961442
63	463010	rs2083440	-0.0119054	0.0293343	0.68485
64	463010	rs2109661	-0.0239454	0.0318109	0.451605
65	463010	rs2269423	-0.00787729	0.0272051	0.772159
66	463010	rs2271386	0.0139466	0.0310554	0.653368
67	463010	rs2341336	-0.0447755	0.0315309	0.155592
68	463010	rs2447535	0.00364169	0.0294907	0.901722
69	463010	rs2470964	-0.0187843	0.0284694	0.509378
70	463010	rs2545795	-0.00313327	0.0309129	0.919266
71	463010	rs2661876	-7.95e-06	0.0308907	0.999795
72	463010	rs2670012	0.0218329	0.0293723	0.457292
73	463010	rs2725377	0.0207056	0.0284777	0.467177
74	463010	rs2735421	-0.00651959	0.0228901	0.775781
75	463010	rs2762546	0.0104775	0.0256801	0.683273
76	463010	rs2858088	-0.0102505	0.0309235	0.740282
77	463010	rs2860049	-0.0116191	0.0250811	0.643177
78	463010	rs2877774	-0.0500835	0.0298076	0.0929134
79	463010	rs28807201	-0.0393926	0.0313729	0.209252
80	463010	rs2885198	-0.0219335	0.0293272	0.454528
81	463010	rs2995803	-0.00815943	0.0233089	0.726296
82	463010	rs303752	-0.0156619	0.0266698	0.557034
83	463010	rs34190234	0.0550773	0.0305375	0.0712948
84	463010	rs34811474	0.0390125	0.0296756	0.188634
85	463010	rs35518360	-0.0185098	0.0304434	0.543181
86	463010	rs35617898	-0.0413215	0.0274359	0.132038
87	463010	rs35649565	-0.0393175	0.0304543	0.196692
88	463010	rs360947	-0.0852802	0.0277163	0.00209163
89	463010	rs3747631	-0.0453649	0.0236147	0.0547257
90	463010	rs3797699	-0.00398572	0.0314769	0.899238
91	463010	rs38857	-0.06795	0.0317882	0.0325506
92	463010	rs3943093	0.000342863	0.0251278	0.989113
93	463010	rs42210	-0.0143874	0.0311818	0.64451
94	463010	rs4540171	-0.0152887	0.0306486	0.617893
95	463010	rs4567409	-0.025485	0.0316748	0.42106
96	463010	rs4691576	-0.0145135	0.025465	0.568718
97	463010	rs4726070	0.0175662	0.0304343	0.563816
98	463010	rs4731366	-0.0123521	0.0306878	0.68731
99	463010	rs478742	-0.0594751	0.0304225	0.0505866
100	463010	rs4808787	-0.0144511	0.0317074	0.64856
101	463010	rs4810227	0.0371647	0.0238951	0.119868
102	463010	rs4877151	0.024549	0.0316608	0.438119
103	463010	rs4906348	-0.0257911	0.026103	0.323128
104	463010	rs4960987	-0.0200244	0.0263072	0.446552
105	463010	rs4983187	-0.0163067	0.023192	0.481983
106	463010	rs549845	0.00310364	0.0183471	0.865668
107	463010	rs56099375	0.0516396	0.0319843	0.106413
108	463010	rs56151069	0.0106965	0.0312319	0.731985
109	463010	rs567203	-0.0535156	0.0252484	0.0340428
110	463010	rs5758922	-0.0226673	0.0307853	0.461547
111	463010	rs580241	0.00603395	0.025455	0.812623
112	463010	rs59123361	0.00828064	0.0270569	0.75957
113	463010	rs613872	0.0209859	0.028201	0.456782
114	463010	rs61527214	-0.0139536	0.0308308	0.650847
115	463010	rs62036613	0.000281163	0.0245223	0.990852
116	463010	rs62063281	-0.0170731	0.0249095	0.493088
117	463010	rs62172156	-0.0565016	0.0231991	0.0148709
118	463010	rs62182993	-0.00481442	0.0236165	0.838464
119	463010	rs62246015	-0.0211383	0.0219521	0.335583
120	463010	rs62507575	0.003971	0.0315269	0.899767
121	463010	rs634546	-0.01299	0.0292857	0.657361
122	463010	rs640177	-0.0333027	0.0217063	0.12497
123	463010	rs6429911	-0.00202533	0.0302726	0.946659
124	463010	rs6556982	-0.0192874	0.0317615	0.543681
125	463010	rs6559365	-0.0103655	0.0290621	0.72134
126	463010	rs6673646	0.00656858	0.0312124	0.833319
127	463010	rs6676960	0.0344204	0.0319319	0.281065
128	463010	rs6704703	-0.042199	0.029434	0.151662
129	463010	rs6707062	0.0158191	0.031052	0.610444
130	463010	rs6735842	0.00750293	0.0320447	0.814877
131	463010	rs67651814	-0.00106761	0.0238123	0.964239
132	463010	rs680767	-0.0657536	0.0314635	0.0366327
133	463010	rs6839304	-0.052098	0.0277649	0.0606003
134	463010	rs723968	-0.0702496	0.0284726	0.0136148
135	463010	rs7257285	-0.0841565	0.0304518	0.00571679
136	463010	rs7260359	-0.0103429	0.0228023	0.650123
137	463010	rs72801817	-0.0353537	0.0263308	0.179377
138	463010	rs72829857	-0.0642865	0.0243886	0.00839088
139	463010	rs7526112	0.00998866	0.0201343	0.619823
140	463010	rs7561798	0.0386359	0.0277543	0.163902
141	463010	rs7577926	-0.0620352	0.0298057	0.0374048
142	463010	rs7582977	0.0388651	0.0316945	0.220108
143	463010	rs76076331	-0.0244151	0.0307512	0.427221
144	463010	rs7613360	-0.0325804	0.0142102	0.0218631
145	463010	rs7757476	0.0532066	0.0268893	0.0478471
146	463010	rs7779631	0.00250804	0.0229282	0.912896
147	463010	rs783562	0.0825294	0.0292872	0.00483343
148	463010	rs7862560	0.000559169	0.0318803	0.986006
149	463010	rs7902	-0.0122751	0.0250682	0.624369
150	463010	rs7921305	0.0105536	0.0232768	0.650264
151	463010	rs7965989	-0.050247	0.0277481	0.0701676
152	463010	rs7966054	-0.0484205	0.0311541	0.120131
153	463010	rs7988627	0.000964319	0.0236564	0.967484
154	463010	rs8051058	0.00270477	0.0293473	0.926568
155	463010	rs8112975	-0.0273471	0.0278418	0.325986
156	463010	rs818414	-0.0275508	0.0304775	0.366011
157	463010	rs860815	-0.0314452	0.0263949	0.233522
158	463010	rs9324380	-0.0341807	0.0256877	0.183312
159	463010	rs9357004	-0.0427566	0.0205206	0.0371966
160	463010	rs9401593	0.00177984	0.0139679	0.898605
161	463010	rs9556958	-0.0113944	0.0282862	0.687077
162	463010	rs9557427	-0.0344613	0.0295213	0.243075
163	463010	rs9608438	-0.0154809	0.0302915	0.609305
164	463010	rs962490	-0.000776524	0.0298008	0.979212
165	463010	rs969512	-0.0121383	0.0253219	0.631684
166	463010	rs9826269	-0.0766478	0.0304464	0.0118201
167	463010	rs9891803	0.0184183	0.0286547	0.520375
168	463010	rs9934839	-0.00219736	0.0283523	0.938224
169	463010	rs9960416	0.0194431	0.0302873	0.520903
170	463010	rs9964724	-0.0142043	0.0169832	0.402945
171	463010	rs997779	-0.0410142	0.029054	0.158052
172	463010	All - Inverse variance weighted	-0.0131528	0.002164	1.22e-09
173	463010	All - MR Egger	-0.0178457	0.0108545	0.102017
